# Supplementary material for: Application of Whole-Genome Sequencing to an Unusual Outbreak of Invasive Group A Streptococcal Disease
Source: PubMed Central journal article supplement — Open Forum Infect Dis. 2016 Feb 19;3(1):ofw042. doi: 10.1093/ofid/ofw042 (PMC4800461; doi:10.1093/ofid/ofw042), 2016-02-19
Supplement: supp_ofw042_ofw042supp.pdf [file supp_ofw042_ofw042supp.pdf]

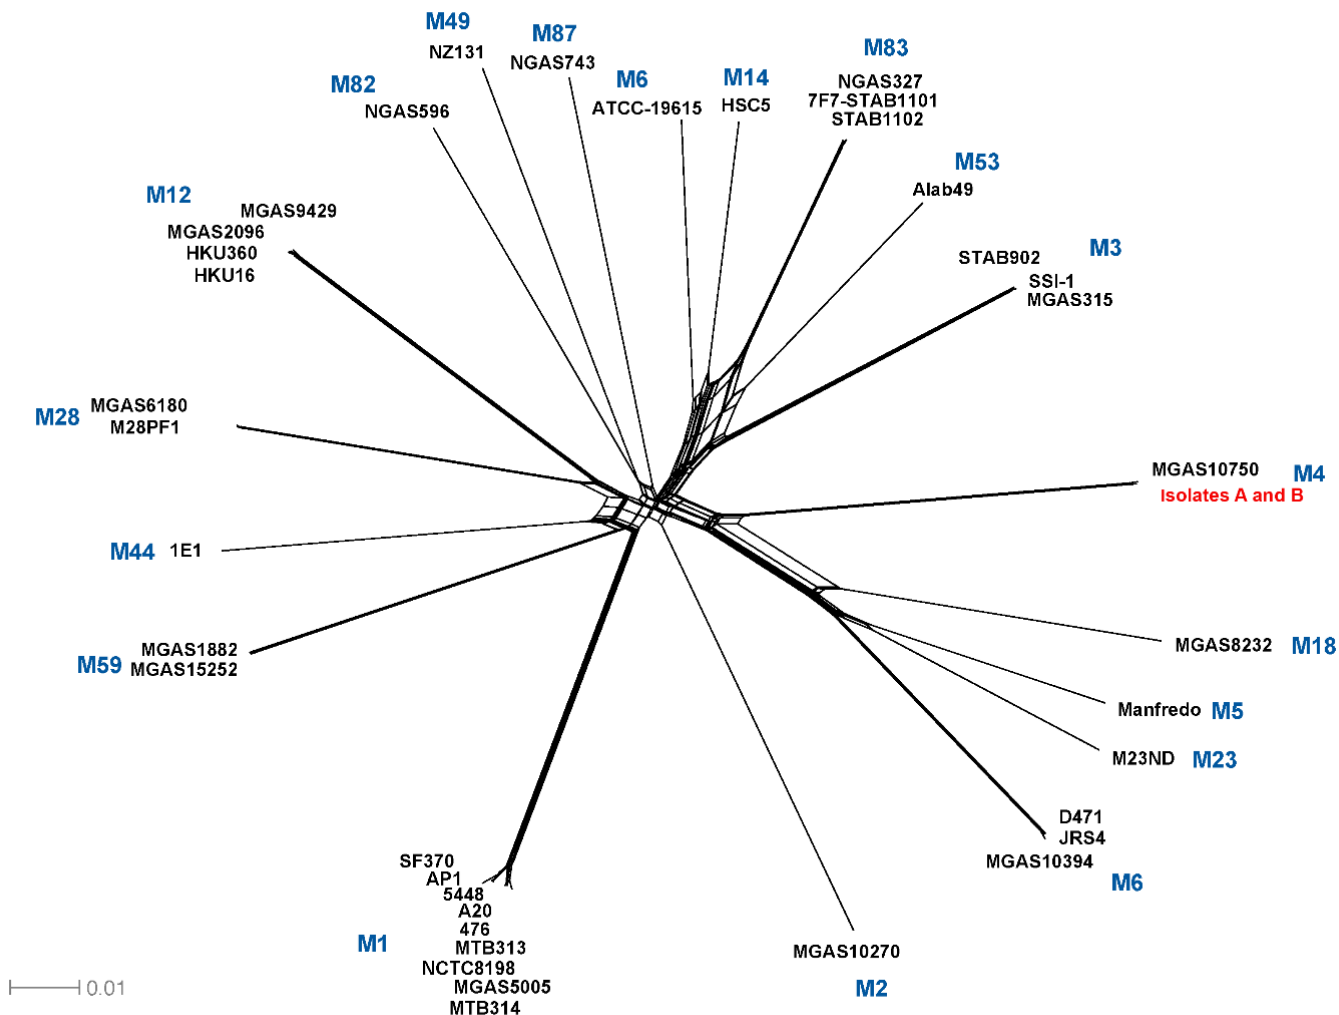

**Supplemental Figure 1. Interserotype phylogenetic relationships among 38 completed GAS genomes and serotype M4 isolates A and B.** Relationships inferred from 68,084 core single nucleotide polymorphism (SNP) loci using SplitsTree.

**Supplemental Table 1: Review of Localized Invasive Group A Streptococcal Outbreaks**

| <b>Author</b>         | <b>Year of Publication</b> | <b>Year of Outbreak</b> | <b>Index Case</b>                                                                                                                                         | <b>Number of Outbreak Cases</b>                                        | <b>Clinical Syndrome</b>                                | <b><i>emm</i> subtype</b> | <b><i>emm</i> Pattern Grouping*</b> |
|-----------------------|----------------------------|-------------------------|-----------------------------------------------------------------------------------------------------------------------------------------------------------|------------------------------------------------------------------------|---------------------------------------------------------|---------------------------|-------------------------------------|
| Harris et al.(1)      | 2015                       | 2013                    | Unknown, two of the isolates were <i>emm</i> type 11; these 2 patients reported no close contact with each other, but they had the same home health aide. | 11 cases                                                               | 5 sepsis, 2 STSS, 4 NF                                  | 1, 11, 12, 82             | A-C, and E                          |
| Tezer Tekce et al.(2) | 2015                       | 2011                    | 77 year old male with bacteremia and surgical site infection (suspected to be acquired at long-term care facility)                                        | 3 cases                                                                | 3 surgical site infections                              | Unknown                   | Unknown                             |
| Mahida et al.(3)      | 2014                       | Unknown                 | Unknown, transmission via colonized curtains in patients' rooms                                                                                           | 4 cases in patients undergoing CT surgery                              | 2 bacteremia, 1 pharyngitis, 1 tracheostomy wound swab  | 1                         | A-C                                 |
| Beaudoin et al.(4)    | 2014                       | 2012                    | Presumed two surgical team members who were colonized with GAS (one asymptomatic, one with recent cellulitis)                                             | 13 cases in patients undergoing liposuction (4 confirmed, 9 suspected) | 4 confirmed: NF +/- STSS, 9 suspected: skin/soft tissue | 28                        | E                                   |

|                    |      |           |                                                                                                                                                                      |          |                                                                                   |           |     |
|--------------------|------|-----------|----------------------------------------------------------------------------------------------------------------------------------------------------------------------|----------|-----------------------------------------------------------------------------------|-----------|-----|
| Mathur et al.(5)   | 2014 | 2012      | Unknown, one patient's surveillance cultures (tracheal aspirate and suction tubing) were positive for GAS, her mother also had a positive GAS throat swab.           | 3 cases  | 3 with invasive infection, including 1 with bacteremia and 1 with wound infection | 58        | E   |
| Dooling et al. (6) | 2013 | 2009-2012 | Unknown, factors identified as contributing to continued infections: staff turnover, compromised skin integrity in residents, a suboptimal infection control program | 24 cases | 15 invasive (3 recurrent) and 6 non-invasive                                      | 11        | E   |
| Al-ajmi et al.(7)  | 2012 | Unknown   | Suspected from a patient with STSS after laparoscopic procedure                                                                                                      | 1 case   | STSS after laparoscopic procedure                                                 | 1         | A-C |
| Johnson et al.(8)  | 2012 | 2009-2010 | A healthcare worker with a severe exfoliative skin condition                                                                                                         | 5 cases  | Surgical infections                                                               | 44        | E   |
| CDC, 2011(9)       | 2011 | 2009-2010 | Unknown; One resident with positive GAS culture from his urinary catheter insertion site, and four staff members with positive GAS oropharyngeal cultures            | 23 cases | 10 invasive and 13 non-invasive                                                   | 89, 11, 2 | E   |
| Strus et al.(10)   | 2010 | 2007      | Operating theatre aid                                                                                                                                                | 6 cases  | Post-surgical invasive infections                                                 | 28        | E   |

|                      |      |           |                                                                                                                                               |                                                                                      |                                                                                             |         |         |
|----------------------|------|-----------|-----------------------------------------------------------------------------------------------------------------------------------------------|--------------------------------------------------------------------------------------|---------------------------------------------------------------------------------------------|---------|---------|
| Martinaud et al.(11) | 2010 | unknown   | 87 year old with erysipelas and STSS                                                                                                          | 3 cases in family members                                                            | 1 bacteremia and abscess, 1 STSS, 1 pharyngitis                                             | 11      | E       |
| Sablier et al.(12)   | 2010 | 2008      | Infant with NF                                                                                                                                | 1 case in surgical nurse suffering scalpel injury during index patient's debridement | 1 NF                                                                                        | Unknown | Unknown |
| Wasserzug et al.(13) | 2009 | 2004-2005 | Unknown; poor hygiene and crowded living conditions implicated in spread                                                                      | 128 cases in Israeli Defense Force infantry units                                    | 1 soldier with STSS (prior to outbreak), 1 with septic olecranon bursitis; 3 with pneumonia | 81      | D       |
| Nolan et al.(14)     | 2008 | 2003      | Presumed asymptomatic healthcare worker working at both hospitals and epidemiologically linked with the four nosocomial cases in the outbreak | 6 nosocomial cases (4 linked)                                                        | 6 invasive cases, of which 2 were NF                                                        | 1       | A-C     |
| Aguero et al.(15)    | 2008 | 2006      | Unknown                                                                                                                                       | 3 cases in children at same                                                          | All STSS                                                                                    | 4       | E       |

|                    |      |           |                                                            |                                    |                                                                                                      |        |     |
|--------------------|------|-----------|------------------------------------------------------------|------------------------------------|------------------------------------------------------------------------------------------------------|--------|-----|
|                    |      |           |                                                            | daycare center                     |                                                                                                      |        |     |
| Thigpen et al.(16) | 2007 | 2003      | Unknown, transmission presumed person-to-person            | 6 cases in a nursing home          | All invasive                                                                                         | 11, 89 | E   |
| Arnold et al.(17)  | 2006 | 2004      | Unknown                                                    | 6 cases in a nursing home          | All invasive                                                                                         | 3      | A-C |
| Felkner et al.(18) | 2005 | 2000-2001 | Unknown, transmission associated with wound care treatment | 28 cases                           | 4 invasive                                                                                           | 114    | E   |
| Greene et al.(19)  | 2005 | 2001      | Unknown, transmission associated with wound care treatment | 8 cases at long-term care facility | 3 sepsis, 3 cellulitis, 2 pneumonia                                                                  | 77     | E   |
| Roy et al.(20)     | 2005 | Unknown   | Unknown                                                    | 7 cases, all family members        | 5 invasive: pneumonia in 2, pneumonia with empyema in 1, sepsis and pneumonia/p leural effusion in 1 | 1      | A-C |
| Kakis et al.(21)   | 2002 | Unknown   | 43 year old woman with necrotizing GAS infection           | 24 cases, all healthcare workers   | 24 with pharyngitis                                                                                  | 1      | A-C |
| Barnham et al.(22) | 2002 | Unknown   | Patient with NF                                            | 3 cases in nursing home residents  | 2 pneumonia (fatal), 1 parapharyngeal abscess                                                        | 3      | A-C |

|                      |      |               |                                                           |                                                            |                                                           |         |         |
|----------------------|------|---------------|-----------------------------------------------------------|------------------------------------------------------------|-----------------------------------------------------------|---------|---------|
| CDC,<br>1999(23)     | 1999 | 1996-<br>1997 | Asymptomatic Healthcare worker                            | 7 cases in post-partum women                               | 7 endometritis (one with shock), 1 UTI, 1 wound infection | 77      | E       |
| CDC,<br>1999(23)     | 1999 | 1996-<br>1997 | Suspected from asymptomatic surgeon involved in all cases | 3 cases in patients who had received procedures by surgeon | 3 STSS (including 2 deaths)                               | 1       | A-C     |
| CDC,<br>1997(24)     | 1997 | 1997          | Female child with NF after varicella infection            | 1 case in daycare classmate                                | 1 submental abscess                                       | Unknown | Unknown |
| Cockerill et al.(25) | 1997 | 1995          | Unknown                                                   | 7 cases                                                    | 7 invasive cases (including 4 with STSS)                  | 3       | A-C     |

Performed using a MEDLINE search for publications on outbreaks of invasive GAS infections dating from 1996 through 2015.

Search was limited to include only articles of outbreaks arising from a common point source where molecular methods were used for epidemiological purposes. Abbreviations: necrotizing fasciitis (NF), streptococcal toxic shock syndrome (STSS), Center for Disease Control and Prevention (CDC). \* Reflects the inferred *emm* pattern groupings A-E based on the *emm* type using reference by McMillan et al. Clin Microbiol Infect. 2013 May; 19(5): E222–E229.

Supplemental Table 2. Sequencing and mapping summary.

| <b>GAS Strain</b> | <b>Total Reads</b> | <b>Reads Mapped to MGAS10750 (%)</b> | <b>Unmapped Reads (%)</b> | <b>Polymorphism relative to reference</b> |
|-------------------|--------------------|--------------------------------------|---------------------------|-------------------------------------------|
| Isolate A         | 13,127,120         | 12,699,701<br>(96.7)                 | 427,419<br>(3.3)          | 912                                       |
| Isolate B         | 13,470,294         | 13,055,855<br>(96.9)                 | 414,439<br>(3.1)          | 913†                                      |

†One additional polymorphism relative to MGAS10750 was found in Isolate B, however this difference lies adjacent to a region of differing gene content in MGAS10750 (phage 10750.2) and is likely erroneous.

Supplemental Table 3. De Novo assembly summary.

| <b>Strain</b> | <b>Total Reads</b> | <b>Matched Reads</b> | <b>Contigs</b> | <b>Max Length</b> | <b>Average Length</b> | <b>Total bases</b> | <b>Reference covered (%)</b> |
|---------------|--------------------|----------------------|----------------|-------------------|-----------------------|--------------------|------------------------------|
| Isolate A     | 13,127,120         | 12,782,414           | 23             | 334,263           | 81,144                | 1,866,317          | 98.93                        |
| Isolate B     | 13,470,294         | 13,147,067           | 22             | 289,054           | 84,150                | 1,851,297          | 98.93                        |



Supplemental Table 4. Summary of clinical isolate polymorphisms relative to MGAS10750

| Region         | Type      | MGAS-10750 | Allele | locus_tag (MGAS10750 (CDS)) | gene | putative product                                       | Non-synonymous |
|----------------|-----------|------------|--------|-----------------------------|------|--------------------------------------------------------|----------------|
| 35910^ 35911   | Insertion | -          | T      |                             |      |                                                        | -              |
| 35917          | SNV†      | C          | T      |                             |      |                                                        | -              |
| 38432          | SNV       | C          | A      | MGAS10750_Spy0023           |      | phosphoribosylformylglucosyl transferase               | Yes            |
| 62112          | SNV       | A          | C      | MGAS10750_Spy0041           |      | bifunctional acetaldehyde-CoA/alcohol dehydrogenase    | Yes            |
| 66398^ 66399   | Insertion | -          | G      | MGAS10750_Spy0045           | rplC | LSU ribosomal protein L3P                              | Yes            |
| 66924^ 66925   | Insertion | -          | G      | MGAS10750_Spy0047           |      | LSU ribosomal protein L1E (L4P)                        | Yes            |
| 70018          | SNV       | C          | T      | MGAS10750_Spy0054           | rplP | 50S ribosomal protein L16                              | Yes            |
| 74406          | SNV       | C          | T      | MGAS10750_Spy0065           | rpsE | 30S ribosomal protein S5                               | No             |
| 81845          | SNV       | C          | T      |                             |      |                                                        | -              |
| 88453          | SNV       | C          | G      |                             |      |                                                        | -              |
| 93115          | SNV       | C          | T      | MGAS10750_Spy0086           | adcB | High-affinity zinc uptake system membrane protein znuB | Yes            |
| 121933         | SNV       | G          | C      | MGAS10750_Spy0114           |      | Fibronectin-binding protein                            | Yes            |
| 127380         | SNV       | G          | A      | MGAS10750_Spy0115           |      | Fibronectin-binding protein                            | Yes            |
| 133259         | SNV       | A          | G      | MGAS10750_Spy0120           |      | Sortase                                                | No             |
| 133486^ 133487 | Insertion | -          | A      | MGAS10750_Spy0120           |      | Sortase                                                | Yes            |
| 137544         | Deletion  | G          | -      |                             |      |                                                        | -              |
| 141742         | SNV       | C          | G      | MGAS10750_Spy0129           | sloR | PfoR family transcriptional regulator                  | Yes            |
| 157266^ 157267 | Insertion | -          | A      | MGAS10750_Spy0143           |      | hypothetical protein                                   | Yes            |
| 161916         | SNV       | A          | T      |                             |      |                                                        | -              |
| 162068         | SNV       | C          | T      | MGAS10750_Spy0148           |      | hypothetical protein                                   | Yes            |
| 182820^ 182821 | Insertion | -          | T      |                             |      |                                                        | -              |
| 183236         | SNV       | G          | A      | MGAS10750_Spy0166           |      | CoA binding protein                                    | Yes            |
| 203811         | SNV       | T          | C      | MGAS10750_Spy0192           |      | ABC transporter family                                 | No             |
| 207417         | SNV       | C          | T      | MGAS10750_Spy0196           |      | Carbonic anhydrase                                     | Yes            |

|                 |           |    |    |                   |       |                                                            |     |
|-----------------|-----------|----|----|-------------------|-------|------------------------------------------------------------|-----|
| 211808          | SNV       | C  | T  | MGAS10750_Spy0199 | fasB  | Sensory transduction protein kinase FasB                   | No  |
| 211901^ 211902  | Insertion | -  | A  | MGAS10750_Spy0199 | fasB  | Sensory transduction protein kinase FasB                   | Yes |
| 217299          | Deletion  | G  | -  |                   |       |                                                            | -   |
| 217302          | SNV       | G  | T  |                   |       |                                                            | -   |
| 227029          | SNV       | C  | T  |                   |       |                                                            | -   |
| 230783          | SNV       | T  | C  | MGAS10750_Spy0221 |       | RmuC family protein                                        | No  |
| 240510          | SNV       | T  | G  | MGAS10750_Spy0228 | plr   | glyceraldehyde 3-phosphate dehydrogenase                   | Yes |
| 241712          | SNV       | C  | T  |                   |       |                                                            | -   |
| 244809^ 244810  | Insertion | -  | C  | MGAS10750_Spy0232 |       | hypothetical protein                                       | Yes |
| 257436          | SNV       | G  | T  | MGAS10750_Spy0245 | dacA2 | D-alanyl-D-alanine serine-type carboxypeptidase            | Yes |
| 276750          | SNV       | A  | G  | MGAS10750_Spy0262 |       | hypothetical protein                                       | No  |
| 283450          | SNV       | G  | A  | MGAS10750_Spy0269 | braB  | Branched-chain amino acid transport system carrier protein | Yes |
| 283485^ 283486  | Insertion | -  | G  | MGAS10750_Spy0269 | braB  | Branched-chain amino acid transport system carrier protein | Yes |
| 291374.. 291375 | MNV       | CT | TA | MGAS10750_Spy0276 |       | hypothetical protein                                       | Yes |
| 320453          | SNV       | C  | G  | MGAS10750_Spy0310 |       | SAM-dependent methyltransferase                            | Yes |
| 320530          | SNV       | C  | A  | MGAS10750_Spy0310 |       | SAM-dependent methyltransferase                            | Yes |
| 326259          | SNV       | C  | T  | MGAS10750_Spy0316 | fhuB  | ferrichrome transport system permease fhuB                 | No  |
| 327334          | SNV       | A  | G  | MGAS10750_Spy0317 | fhuD  | ferrichrome-binding protein                                | No  |
| 329837          | SNV       | C  | T  | MGAS10750_Spy0320 |       | transposase                                                | Yes |
| 332058          | SNV       | A  | C  | MGAS10750_Spy0321 | murE  | UDP-N-acetylmuramoylalanyl-D-glutamate--L-lysine ligase    | Yes |
| 339256          | Deletion  | G  | -  | MGAS10750_Spy0331 |       | Tetrapyrrole (Corrin/Prophyrin) methylase family protein   | Yes |
| 341154          | SNV       | G  | A  | MGAS10750_Spy0336 |       | hypothetical protein                                       | Yes |

|                |           |   |   |                                      |       |                                                     |     |
|----------------|-----------|---|---|--------------------------------------|-------|-----------------------------------------------------|-----|
| 341177^ 341178 | Insertion | - | C | MGAS10750_Spy0336                    |       | hypothetical protein                                | Yes |
| 346871         | SNV       | G | C | MGAS10750_Spy0339                    |       | endopeptidase lactocepin                            | Yes |
| 346916         | Deletion  | A | - | MGAS10750_Spy0339                    |       | endopeptidase lactocepin                            | Yes |
| 360392         | SNV       | A | G |                                      |       |                                                     | -   |
| 360617         | Deletion  | G | - | MGAS10750_Spy0355                    |       | hypothetical protein                                | Yes |
| 362633         | Deletion  | T | - |                                      |       |                                                     | -   |
| 369426         | SNV       | G | C | MGAS10750_Spy0364                    | glmU  | glucosamine-1-phosphate acetyltransferase           | Yes |
| 369483         | SNV       | G | C | MGAS10750_Spy0364                    | glmU  | glucosamine-1-phosphate acetyltransferase           | Yes |
| 371753         | SNV       | C | T | MGAS10750_Spy0369                    | scaR  | Iron-dependent repressor                            | Yes |
| 374182         | SNV       | C | T | MGAS10750_Spy0372                    | mtsC  | Manganese transport system membrane protein         | Yes |
| 383152^ 383153 | Insertion | - | A |                                      |       |                                                     | -   |
| 383367         | SNV       | C | G | MGAS10750_Spy0381                    | msrA2 | methionine sulfoxide reductase A                    | Yes |
| 388456         | Deletion  | C | - | MGAS10750_Spy0385                    | phoH  | PhoH protein                                        | Yes |
| 396395         | SNV       | G | A |                                      |       |                                                     | -   |
| 398785         | Deletion  | T | - | MGAS10750_Spy0403                    |       | Response regulator FasA                             | Yes |
| 407025         | SNV       | A | G | MGAS10750_Spy0415                    |       | hypothetical protein                                | Yes |
| 424185         | SNV       | T | C | MGAS10750_Spy0435                    |       | NAD(P)H-dependent quinone reductase                 | Yes |
| 432471         | Deletion  | T | - | MGAS10750_Spy0441, MGAS10750_Spy0442 | drdA  | Daunorubicin resistance ATP-binding protein drdA    | Yes |
| 436915         | SNV       | C | A | MGAS10750_Spy0447                    |       | dihydroxyacetone kinase subunit DhaK                | Yes |
| 454691         | SNV       | C | T | MGAS10750_Spy0464                    |       | hypothetical protein                                | Yes |
| 458275         | SNV       | C | T | MGAS10750_Spy0467                    |       | cell wall biogenesis glycosyltransferase            | No  |
| 479041         | SNV       | T | G | MGAS10750_Spy0496                    | licT  | transcription antiterminator, BglG family           | Yes |
| 480864         | SNV       | T | C | MGAS10750_Spy0497                    |       | PTS system, beta-glucoside-specific IIABC component | Yes |
| 487177         | SNV       | G | A | MGAS10750_Spy0502                    |       | transcription accessory protein                     | No  |
| 493987         | SNV       | G | A |                                      |       |                                                     | -   |

|                |             |   |    |                   |       |                                                                     |     |
|----------------|-------------|---|----|-------------------|-------|---------------------------------------------------------------------|-----|
| 494355         | SNV         | C | A  |                   |       |                                                                     | -   |
| 494363         | SNV         | C | T  |                   |       |                                                                     | -   |
| 494366         | Replacement | G | TA |                   |       |                                                                     | -   |
| 494389         | SNV         | G | A  |                   |       |                                                                     | -   |
| 494391         | SNV         | T | C  |                   |       |                                                                     | -   |
| 494396         | SNV         | A | T  |                   |       |                                                                     | -   |
| 494401         | SNV         | G | A  |                   |       |                                                                     | -   |
| 494403         | SNV         | T | C  |                   |       |                                                                     | -   |
| 494418         | SNV         | G | A  |                   |       |                                                                     | -   |
| 496823         | SNV         | C | T  | MGAS10750_Spy0515 |       | Haloacid dehalogenase-like hydrolase                                | No  |
| 500726         | SNV         | C | T  | MGAS10750_Spy0520 |       | membrane protein                                                    | Yes |
| 529557         | SNV         | T | C  | MGAS10750_Spy0546 | kgdA  | keto-hydroxyglutarate-aldolase/keto-deoxy-phosphogluconate aldolase | No  |
| 552047         | SNV         | G | A  | MGAS10750_Spy0570 |       | phage protein                                                       | No  |
| 588636         | SNV         | G | T  | MGAS10750_Spy0621 | speJ  | Enterotoxin                                                         | Yes |
| 602173         | SNV         | T | G  | MGAS10750_Spy0635 |       | DNA gyrase subunit B                                                | Yes |
| 611533         | SNV         | C | A  | MGAS10750_Spy0642 |       | transcriptional regulator                                           | Yes |
| 616040         | SNV         | T | C  | MGAS10750_Spy0643 | epf   | Extracellular matrix binding protein                                | No  |
| 616063         | SNV         | C | G  | MGAS10750_Spy0643 | epf   | Extracellular matrix binding protein                                | Yes |
| 616824^ 616825 | Insertion   | - | T  |                   |       |                                                                     | -   |
| 626125         | Deletion    | A | -  |                   |       |                                                                     | -   |
| 660741         | Deletion    | A | -  | MGAS10750_Spy0684 |       | transposase                                                         | Yes |
| 667275         | SNV         | T | C  | MGAS10750_Spy0690 | rgpAc | alpha-D-GlcNAc alpha-1,2-L-rhamnosyltransferase                     | No  |
| 669866         | SNV         | C | T  | MGAS10750_Spy0693 | rgpDc | Polysaccharide export ATP-binding protein                           | No  |
| 681531^ 681532 | Insertion   | - | G  |                   |       |                                                                     | -   |
| 690195         | SNV         | G | A  | MGAS10750_Spy0714 |       | hypothetical protein                                                | Yes |
| 693637         | SNV         | C | T  |                   |       |                                                                     | -   |
| 694916         | Deletion    | A | -  | MGAS10750_Spy0718 | nifS1 | cysteine desulfurase / Selenocysteine lyase                         | Yes |
| 700489         | SNV         | G | T  | MGAS10750_Spy0725 |       | LysR family transcriptional regulator                               | Yes |

|                |           |   |   |                   |      |                                                  |     |
|----------------|-----------|---|---|-------------------|------|--------------------------------------------------|-----|
| 705817         | SNV       | T | C | MGAS10750_Spy0731 | carA | carbamoyl phosphate synthase small subunit       | No  |
| 730809         | SNV       | T | C | MGAS10750_Spy0753 | fruA | PTS system, fructose-specific IIABC component    | Yes |
| 732028         | SNV       | G | A | MGAS10750_Spy0753 | fruA | PTS system, fructose-specific IIABC component    | No  |
| 758186^ 758187 | Insertion | - | T | MGAS10750_Spy0785 |      | hypothetical protein                             | Yes |
| 758225         | SNV       | G | A | MGAS10750_Spy0785 |      | hypothetical protein                             | Yes |
| 761028         | SNV       | G | C |                   |      |                                                  | -   |
| 761143^ 761144 | Insertion | - | G |                   |      |                                                  | -   |
| 772687         | SNV       | G | A | MGAS10750_Spy0799 |      | cystine transport system permease                | Yes |
| 795542         | SNV       | C | T | MGAS10750_Spy0821 | recJ | Single-stranded-DNA-specific exonuclease recJ    | No  |
| 857745         | SNV       | A | G |                   |      |                                                  | -   |
| 862700         | SNV       | G | A | MGAS10750_Spy0909 | hylA | Hyaluronate lyase precursor                      | Yes |
| 864249         | SNV       | T | C | MGAS10750_Spy0909 | hylA | Hyaluronate lyase precursor                      | Yes |
| 881164         | SNV       | A | G | MGAS10750_Spy0924 |      | hypothetical protein                             | Yes |
| 882253         | SNV       | C | T | MGAS10750_Spy0926 |      | nucleoside diphosphate kinase                    | No  |
| 884261         | Deletion  | A | - | MGAS10750_Spy0927 | lepA | GTP-binding protein LepA                         | Yes |
| 884989         | SNV       | T | C | MGAS10750_Spy0928 |      | Collagen-like surface protein                    | No  |
| 886730         | SNV       | G | C | MGAS10750_Spy0930 |      | hypothetical protein                             | Yes |
| 899029         | SNV       | T | G | MGAS10750_Spy0941 |      | dipeptidase PepV                                 | Yes |
| 911885         | SNV       | G | C | MGAS10750_Spy0958 |      | serine/threoninedehydratase                      | Yes |
| 932193         | SNV       | C | G | MGAS10750_Spy0983 | malP | Malate-sodium symport                            | Yes |
| 932700         | SNV       | A | G | MGAS10750_Spy0983 | malP | Malate-sodium symport                            | Yes |
| 937678         | Deletion  | G | - | MGAS10750_Spy0987 |      | chloride channel protein                         | Yes |
| 944263         | SNV       | G | A | MGAS10750_Spy0996 |      | ribose-phosphate pyrophosphokinase               | Yes |
| 957446         | SNV       | G | A | MGAS10750_Spy1009 | apbE | Iron-sulfur cluster assembly/repair protein ApbE | No  |
| 961830         | Deletion  | C | - | MGAS10750_Spy1015 |      | phosphinothricin N-acetyltransferase             | Yes |

|                  |           |    |    |                   |      |                                                                    |     |
|------------------|-----------|----|----|-------------------|------|--------------------------------------------------------------------|-----|
| 962229           | SNV       | A  | G  | MGAS10750_Spy1016 | glyA | serine hydroxymethyltransferase                                    | Yes |
| 964086           | SNV       | A  | G  | MGAS10750_Spy1017 |      | hypothetical protein                                               | Yes |
| 973498           | SNV       | A  | G  | MGAS10750_Spy1023 | gyrA | DNA gyrase subunit A                                               | No  |
| 990492           | SNV       | T  | A  | MGAS10750_Spy1044 |      | hypothetical protein                                               | Yes |
| 995643           | SNV       | A  | C  |                   |      |                                                                    | -   |
| 997393           | Deletion  | G  | -  | MGAS10750_Spy1052 | oadB | Na <sup>+</sup> transporting oxaloacetate decarboxylase beta chain | Yes |
| 1004897          | Deletion  | A  | -  |                   |      |                                                                    | -   |
| 1024201          | SNV       | A  | G  | MGAS10750_Spy1077 | lplA | Lipoate-protein ligase A                                           | Yes |
| 1027000          | SNV       | C  | T  | MGAS10750_Spy1080 |      | glycine cleavage system H protein                                  | Yes |
| 1028713          | SNV       | C  | T  | MGAS10750_Spy1082 |      | Probable NADH-dependent flavin oxidoreductase yqiG                 | No  |
| 1031680          | SNV       | G  | A  | MGAS10750_Spy1085 | dfp  | phosphopantothenoicysteine decarboxylase                           | Yes |
| 1034367          | SNV       | A  | C  |                   |      |                                                                    | -   |
| 1034466          | SNV       | T  | C  | MGAS10750_Spy1088 |      | nucleoside transport system permease                               | Yes |
| 1040935          | SNV       | T  | C  | MGAS10750_Spy1093 |      | 16S rRNA m(2)G 1207 methyltransferase                              | No  |
| 1054508^1054509  | Insertion | -  | C  | MGAS10750_Spy1108 |      | Myo-inositol-1(or 4)-monophosphatase                               | Yes |
| 1066173          | SNV       | C  | G  | MGAS10750_Spy1122 |      | hypothetical protein                                               | Yes |
| 1066474          | SNV       | G  | T  | MGAS10750_Spy1123 |      | General stress protein, Glc24 family                               | Yes |
| 1066514          | SNV       | G  | T  | MGAS10750_Spy1123 |      | General stress protein, Glc24 family                               | Yes |
| 1068495          | SNV       | C  | T  | MGAS10750_Spy1127 | pcrA | DNA helicase II                                                    | Yes |
| 1073267          | SNV       | C  | T  | MGAS10750_Spy1130 |      | Cobalt-zinc-cadmium resistance protein czcD                        | Yes |
| 1074353          | SNV       | C  | T  | MGAS10750_Spy1131 | cfa  | cAMP factor                                                        | Yes |
| 1083438..1083439 | MNV       | GG | TT | MGAS10750_Spy1139 | pfk  | 6-phosphofructokinase                                              | Yes |
| 1085255          | SNV       | C  | A  | MGAS10750_Spy1140 | dnaE | DNA polymerase III DnaE                                            | Yes |
| 1092653          | SNV       | A  | G  | MGAS10750_Spy1147 | glgP | maltodextrin phosphorylase                                         | No  |

|                  |           |    |    |                                         |      |                                                                     |     |
|------------------|-----------|----|----|-----------------------------------------|------|---------------------------------------------------------------------|-----|
| 1104794          | Deletion  | G  | -  | MGAS10750_Spy1157,<br>MGAS10750_Spy1158 | amyA | Cyclodextrin glucanotransferase,<br>Cyclodextrin glucanotransferase | Yes |
| 1126074          | SNV       | A  | C  |                                         |      |                                                                     | -   |
| 1130113          | SNV       | C  | T  | MGAS10750_Spy1181                       | obgE | GTPase ObgE                                                         | Yes |
| 1132065          | SNV       | T  | C  | MGAS10750_Spy1184                       |      | transposase                                                         | No  |
| 1140703..1140704 | MNV       | AG | TT | MGAS10750_Spy1194                       |      | hypothetical protein                                                | Yes |
| 1150887          | SNV       | T  | C  | MGAS10750_Spy1204                       |      | ribosomal-protein-S5-alanine<br>acetyltransferase                   | Yes |
| 1158640          | SNV       | C  | G  | MGAS10750_Spy1209                       | birA | biotin--protein ligase                                              | Yes |
| 1160504          | Deletion  | C  | -  | MGAS10750_Spy1211,<br>MGAS10750_Spy1212 |      | DNA polymerase III subunit gamma/tau,                               | Yes |
| 1169352          | SNV       | G  | A  | MGAS10750_Spy1222                       | pstI | phosphoenolpyruvate-protein<br>phosphotransferase                   | No  |
| 1171676          | Deletion  | G  | -  | MGAS10750_Spy1224                       |      | glutaredoxin                                                        | Yes |
| 1193076          | SNV       | A  | G  | MGAS10750_Spy1247                       | queA | S-adenosylmethionine:tRNA<br>ribosyltransferase-isomerase           | Yes |
| 1197896          | SNV       | A  | G  | MGAS10750_Spy1253                       | holA | DNA polymerase III subunit delta                                    | No  |
| 1261189^1261190  | Insertion | -  | G  | MGAS10750_Spy1335                       |      | DNA repair protein recN                                             | Yes |
| 1292938^1292939  | Insertion | -  | A  |                                         |      |                                                                     | -   |
| 1298609          | SNV       | C  | G  | MGAS10750_Spy1373                       |      | ATP-dependent endopeptidase Lon                                     | Yes |
| 1326874          | SNV       | C  | T  | MGAS10750_Spy1400                       | valS | valyl-tRNA synthetase                                               | Yes |
| 1329948^1329949  | Insertion | -  | A  |                                         |      |                                                                     | -   |
| 1346332          | SNV       | C  | T  | MGAS10750_Spy1419                       |      | sugar ABC transporter permease                                      | Yes |
| 1347815          | SNV       | T  | C  |                                         |      |                                                                     | -   |
| 1352427          | Deletion  | C  | -  |                                         |      |                                                                     | -   |
| 1352445          | SNV       | G  | C  |                                         |      |                                                                     | -   |
| 1372461          | SNV       | A  | C  |                                         |      |                                                                     | -   |
| 1409397          | SNV       | T  | C  | MGAS10750_Spy1471                       |      | amino acid transport ATP-binding protein                            | Yes |
| 1409637          | SNV       | C  | A  | MGAS10750_Spy1472                       |      | amino acid ABC transporter permease                                 | No  |

|                  |           |    |    |                                      |       |                                                 |     |
|------------------|-----------|----|----|--------------------------------------|-------|-------------------------------------------------|-----|
| 1416941^1416942  | Insertion | -  | A  | MGAS10750_Spy1479                    |       | hypothetical protein                            | Yes |
| 1418030          | SNV       | T  | C  | MGAS10750_Spy1480                    | proA  | gamma-glutamyl phosphate reductase              | Yes |
| 1423844^1423845  | Insertion | -  | T  | MGAS10750_Spy1486                    |       | transketolase                                   | Yes |
| 1432158          | Deletion  | A  | -  |                                      |       |                                                 | -   |
| 1433664          | SNV       | A  | C  | MGAS10750_Spy1495                    | glyS  | glycyl-tRNA synthetase subunit beta             | Yes |
| 1438847          | Deletion  | G  | -  | MGAS10750_Spy1500                    | nagA  | N-acetylglucosamine-6-phosphate deacetylase     | Yes |
| 1443390^1443391  | Insertion | -  | G  |                                      |       |                                                 | -   |
| 1443446^1443447  | Insertion | -  | G  |                                      |       |                                                 | -   |
| 1443559          | SNV       | G  | C  |                                      |       |                                                 | -   |
| 1446414          | SNV       | G  | A  | MGAS10750_Spy1508                    | lacD1 | tagatose 1,6-diphosphate aldolase               | Yes |
| 1452763          | SNV       | G  | T  | MGAS10750_Spy1518                    | copA  | Copper-exporting ATPase                         | Yes |
| 1454999          | SNV       | G  | A  | MGAS10750_Spy1519                    | copY  | CopAB ATPase metal-fist type repressor          | Yes |
| 1458741          | SNV       | T  | C  | MGAS10750_Spy1522                    | infB  | translation initiation factor IF-2              | No  |
| 1470545          | SNV       | G  | A  |                                      |       |                                                 | -   |
| 1471638          | SNV       | C  | A  |                                      |       |                                                 | -   |
| 1484663          | Deletion  | A  | -  | MGAS10750_Spy1551, MGAS10750_Spy1552 | fabK  | Enoyl- reductase (NADH), Enoyl-reductase (NADH) | Yes |
| 1484755          | SNV       | T  | C  | MGAS10750_Spy1552                    |       | Enoyl- reductase (NADH)                         | Yes |
| 1494740          | SNV       | G  | A  | MGAS10750_Spy1563                    |       | phosphoglycerate mutase family protein          | Yes |
| 1495235          | SNV       | G  | A  |                                      |       |                                                 | -   |
| 1500237          | SNV       | T  | C  |                                      |       |                                                 | -   |
| 1503383          | SNV       | A  | T  |                                      |       |                                                 | -   |
| 1503905          | SNV       | G  | C  | MGAS10750_Spy1574                    |       | Universal stress protein family                 | Yes |
| 1537814..1537815 | MNV       | AG | CA | MGAS10750_Spy1600                    |       | hypothetical protein                            | Yes |
| 1543916          | SNV       | G  | T  | MGAS10750_Spy1606                    | efp   | elongation factor P                             | Yes |
| 1551740          | Deletion  | C  | -  | MGAS10750_Spy1614                    | rpsF  | SSU ribosomal protein S6P                       | Yes |
| 1561038          | SNV       | C  | T  | MGAS10750_Spy1625                    | recD  | exodeoxyribonuclease V alpha chain              | No  |
| 1564270          | SNV       | C  | G  | MGAS10750_Spy1627                    | dinP  | DNA polymerase IV                               | Yes |
| 1564326          | SNV       | C  | G  | MGAS10750_Spy1627                    | dinP  | DNA polymerase IV                               | Yes |



|                  |           |        |   |                                      |      |                                                       |     |
|------------------|-----------|--------|---|--------------------------------------|------|-------------------------------------------------------|-----|
| 1564397          | SNV       | C      | G | MGAS10750_Spy1627                    | dinP | DNA polymerase IV                                     | Yes |
| 1564540          | SNV       | C      | G | MGAS10750_Spy1627                    | dinP | DNA polymerase IV                                     | Yes |
| 1576708          | SNV       | A      | G |                                      |      |                                                       | -   |
| 1577275          | SNV       | T      | C |                                      |      |                                                       | -   |
| 1590154          | SNV       | C      | T | MGAS10750_Spy1654                    | glnA | glutamine synthetase                                  | Yes |
| 1690611          | SNV       | T      | C |                                      |      |                                                       | -   |
| 1694766          | SNV       | A      | T |                                      |      |                                                       | -   |
| 1704655          | SNV       | C      | T | MGAS10750_Spy1756                    | ulaA | PTS system ascorbate-specific transporter subunit IIC | No  |
| 1708333          | Deletion  | T      | - |                                      |      |                                                       | -   |
| 1715544          | SNV       | G      | A |                                      |      |                                                       | -   |
| 1719693^1719694  | Insertion | -      | A | MGAS10750_Spy1769                    | cdsA | phosphatidate cytidyltransferase                      | Yes |
| 1720212          | SNV       | T      | A | MGAS10750_Spy1770                    | uppS | undecaprenyl pyrophosphate synthase                   | Yes |
| 1722917          | SNV       | G      | A | MGAS10750_Spy1774                    | pulA | Pullulanase                                           | No  |
| 1728203          | SNV       | G      | C | MGAS10750_Spy1776                    | msmK | Multiple sugar transport ATP-binding protein msmK     | Yes |
| 1728265          | SNV       | A      | G | MGAS10750_Spy1776                    | msmK | Multiple sugar transport ATP-binding protein msmK     | No  |
| 1734953..1734961 | Deletion  | CACCTT | - | MGAS10750_Spy1781                    | sclA | Collagen-like surface protein                         | Yes |
| 1735062          | SNV       | C      | G | MGAS10750_Spy1781                    | sclA | Collagen-like surface protein                         | Yes |
| 1735362^1735363  | Insertion | -      | T |                                      |      |                                                       | -   |
| 1735367          | SNV       | G      | A |                                      |      |                                                       | -   |
| 1735504          | SNV       | G      | A |                                      |      |                                                       | -   |
| 1741215          | SNV       | C      | G | MGAS10750_Spy1786                    | prmA | ribosomal protein L11 methyltransferase               | No  |
| 1741274          | SNV       | C      | G | MGAS10750_Spy1786                    | prmA | ribosomal protein L11 methyltransferase               | Yes |
| 1749287          | SNV       | T      | C |                                      |      |                                                       | -   |
| 1758756          | Deletion  | C      | - | MGAS10750_Spy1803, MGAS10750_Spy1804 |      | Streptococcal histidine triad protein                 | Yes |
| 1760875          | SNV       | T      | G | MGAS10750_Spy1806                    |      | Fibronectin-binding protein                           | Yes |
| 1764232          | SNV       | C      | A | MGAS10750_Spy1807                    | scpA | C5A peptidase precursor                               | Yes |

|                  |           |    |   |                   |       |                                                    |     |
|------------------|-----------|----|---|-------------------|-------|----------------------------------------------------|-----|
| 1764668          | SNV       | G  | T | MGAS10750_Spy1807 | scpA  | C5A peptidase precursor                            | Yes |
| 1765411          | SNV       | A  | G |                   |       |                                                    | -   |
| 1769297          | SNV       | A  | G | MGAS10750_Spy1810 |       | M protein                                          | No  |
| 1779906          | Deletion  | C  | - |                   |       |                                                    | -   |
| 1783417          | Deletion  | T  | - | MGAS10750_Spy1823 |       | Fibronectin-binding protein                        | Yes |
| 1783434^1783435  | Insertion | -  | C | MGAS10750_Spy1823 |       | Fibronectin-binding protein                        | Yes |
| 1789234          | SNV       | T  | C | MGAS10750_Spy1828 | speB  | Streptopain precursor                              | Yes |
| 1790659          | SNV       | C  | T | MGAS10750_Spy1831 | rgg   | transcriptional regulator                          | Yes |
| 1790695          | SNV       | C  | T | MGAS10750_Spy1831 | rgg   | transcriptional regulator                          | Yes |
| 1803298          | SNV       | C  | T | MGAS10750_Spy1847 | pbp2A | Multimodular transpeptidase-transglycosylase PBP2A | Yes |
| 1823277          | SNV       | C  | T | MGAS10750_Spy1863 | hutU  | urocanate hydratase                                | No  |
| 1826654          | SNV       | A  | C | MGAS10750_Spy1866 | fhs2  | formate--tetrahydrofolate ligase                   | Yes |
| 1836187          | SNV       | G  | T | MGAS10750_Spy1872 | rpsB  | 30S ribosomal protein S2                           | No  |
| 1858428..1858429 | Deletion  | TC | - | MGAS10750_Spy1893 | tag   | DNA-3-methyladenine glycosylase                    | Yes |
| 1876442          | SNV       | G  | A |                   |       |                                                    | -   |
| 1876521^1876522  | Insertion | -  | T |                   |       |                                                    | -   |
| 1876636          | SNV       | A  | T |                   |       |                                                    | -   |
| 1876643          | SNV       | A  | C |                   |       |                                                    | -   |
| 1882287          | SNV       | G  | A | MGAS10750_Spy1926 | uviB  | Bacteriocin uviB                                   | Yes |
| 1890181          | SNV       | T  | C | MGAS10750_Spy1935 | cadC  | Cadmium efflux system accessory protein            | Yes |
| 1894934          | SNV       | A  | G |                   |       |                                                    | -   |
| 1901073          | SNV       | C  | A | MGAS10750_Spy1949 | rpsD  | 30S ribosomal protein S4                           | Yes |
| 1923337          | Deletion  | C  | - | MGAS10750_Spy1969 |       | glucose uptake family protein                      | Yes |
| 1927718          | Deletion  | C  | - |                   |       |                                                    | -   |
| 1927730          | SNV       | G  | A |                   |       |                                                    | -   |
| 1932503          | Deletion  | A  | - |                   |       |                                                    | -   |

† SNV = Single nucleotide variation

## References

1. **Harris AM, Yazzie D, Antone-Nez R, Dinè-Chacon G, Kinlacheeny JB, Foley D, Yasmin S, Adams L, Livar E, Terranella A, Yeager L, Komatsu K, Van Beneden C, Langley G.** 2015. Community-Acquired Invasive GAS Disease among Native Americans, Arizona, USA, Winter 2013. *Emerg Infect Dis* 21:177–179.
2. **Tezer Tekçe Y, Erbay A, Ünalđı Ö, Çabadak H, Şen S, Durmaz R.** 2015. An outbreak of *Streptococcus pyogenes* surgical site infections in a cardiovascular surgery department. *Surg Infect* 16:151–154.
3. **Mahida N, Beal A, Trigg D, Vaughan N, Boswell T.** 2014. Outbreak of invasive group A streptococcus infection: contaminated patient curtains and cross-infection on an ear, nose and throat ward. *J Hosp Infect* 87:141–144.
4. **Beaudoin AL, Torso L, Richards K, Said M, Van Beneden C, Longenberger A, Ostroff S, Wendt J, Dooling K, Wise M, Blythe D, Wilson L, Moll M, Perz JF.** 2014. Invasive group A *Streptococcus* infections associated with liposuction surgery at outpatient facilities not subject to state or federal regulation. *JAMA Intern Med* 174:1136–1142.
5. **Mathur P, Bhardwaj N, Gupta G, Punia P, Tak V, John NV, Agrawal D, Misra MC.** 2014. Outbreak of *Streptococcus pyogenes* emm type 58 in a high dependency unit of a level-1 trauma center of India. *Indian J Crit Care Med Peer-Rev Off Publ Indian Soc Crit Care Med* 18:77–82.

6. **Dooling KL, Crist MB, Nguyen DB, Bass J, Lorentzson L, Toews K-A, Pondo T, Stone ND, Beall B, Beneden CV.** 2013. Investigation of a Prolonged Group A Streptococcal Outbreak Among Residents of a Skilled Nursing Facility, Georgia, 2009–2012. *Clin Infect Dis* 57:1562–1567.
7. **Al-ajmi JA, Hill P, O' Boyle C, Garcia MLB, Malkawi M, George A, Saleh F, Lukose B, Ali BA, Elsheikh M.** 2012. Group A Streptococcus Toxic Shock Syndrome: An outbreak report and review of the literature. *J Infect Public Health* 5:388–393.
8. **Johnson E, Giri P, Parsons HK.** 2012. Role of occupational health staff in investigation of invasive group A streptococcal infection hospital outbreak. *J Hosp Infect* 81:199–201.
9. Centers for Disease Control and Prevention (CDC). 2011. Invasive group A streptococcus in a skilled nursing facility--Pennsylvania, 2009-2010. *MMWR Morb Mortal Wkly Rep* 60:1445–1449.
10. **Strus M, Drzewiecki A, Chmielarczyk A, Tomusiak A, Romanek P, Kosowski K, Kochan P, van der Linden M, Lütticken R, Heczko PB.** 2010. Microbiological investigation of a hospital outbreak of invasive group A streptococcal disease in Krakow, Poland. *Clin Microbiol Infect Off Publ Eur Soc Clin Microbiol Infect Dis* 16:1442–1447.
11. **Martinaud C, Doloy A, Graffin B, Gaillard T, Poyet R, Mallet S, Carsuzaa F, Brisou P, Bouvet A.** 2010. A family outbreak due to an emm-type 11

multiresistant strain of *Streptococcus pyogenes*. *Clin Microbiol Infect Off Publ Eur Soc Clin Microbiol Infect Dis* 16:292–295.

12. **Sablier F, Slaouti T, Drèze P-A, El Fouly PE, Allemeersch D, Van Melderden L, Smeesters PR.** 2010. Nosocomial transmission of necrotising fasciitis. *Lancet* 375:1052.
13. **Wasserzug O, Valinsky L, Klement E, Bar-Zeev Y, Davidovitch N, Orr N, Korenman Z, Kayouf R, Sela T, Ambar R, Derazne E, Dagan R, Zarka S.** 2009. A cluster of ecthyma outbreaks caused by a single clone of invasive and highly infective *Streptococcus pyogenes*. *Clin Infect Dis Off Publ Infect Dis Soc Am* 48:1213–1219.
14. **Nolan L, Schertzberg R, Wilson-Clark S, McGeer A, Pellizzari R, Steingart C.** 2008. Outbreak of invasive group A streptococcal disease in two hospitals, Ontario, 2003. *Can Commun Dis Rep Relevé Mal Transm Au Can* 34:8–19.
15. **Aguero J, Ortega-Mendi M, Eliecer Cano M, Gonzalez de Aledo A, Calvo J, Vilorio L, Mellado P, Pelayo T, Fernandez-Rodriguez A, Martinez-Martinez L.** 2008. Outbreak of invasive group A streptococcal disease among children attending a day-care center. *Pediatr Infect Dis J* 27:602–604.
16. **Thigpen MC, Thomas DM, Gloss D, Park SY, Khan AJ, Fogelman VL, Beall B, Van Beneden CA, Todd RL, Greene CM.** 2007. Nursing home

outbreak of invasive group A streptococcal infections caused by 2 distinct strains. *Infect Control Hosp Epidemiol* 28:68–74.

17. **Arnold KE, Schweitzer JL, Wallace B, Salter M, Neeman R, Hlady WG, Beall B.** 2006. Tightly clustered outbreak of group A streptococcal disease at a long-term care facility. *Infect Control Hosp Epidemiol* 27:1377–1384.
18. **Felkner M, Pascoe N, Shupe-Ricksecker K, Goodman E.** 2005. The wound care team: a new source of group A streptococcal nosocomial transmission. *Infect Control Hosp Epidemiol* 26:462–465.
19. **Greene CM, Van Beneden CA, Javadi M, Skoff TH, Beall B, Facklam R, Abercrombie DR, Kramer SL, Arnold KE.** 2005. Cluster of deaths from group A streptococcus in a long-term care facility--Georgia, 2001. *Am J Infect Control* 33:108–113.
20. **Roy S, Kaplan EL, Rodriguez B, Schreiber JR, Salata RA, Palavecino E, John CC.** 2003. A family cluster of five cases of group A streptococcal pneumonia. *Pediatrics* 112:e61–65.
21. **Kakis A, Gibbs L, Eguia J, Kimura J, Vogelei D, Troup N, Stevens D, Kaplan EL, Johnson DR, Conte JE.** 2002. An outbreak of group A Streptococcal infection among health care workers. *Clin Infect Dis Off Publ Infect Dis Soc Am* 35:1353–1359.

22. **Barnham M, Hunter S, Hanratty B, Kirby P, Tanna A, Efstratiou A.** 2001. Invasive M-type 3 *Streptococcus pyogenes* affecting a family and a residential home. *Commun Dis Public Health PHLS* 4:64–67.
23. Centers for Disease Control and Prevention (CDC). 1999. Nosocomial group A streptococcal infections associated with asymptomatic health-care workers--Maryland and California, 1997. *MMWR Morb Mortal Wkly Rep* 48:163–166.
24. Centers for Disease Control and Prevention (CDC). 1997. Outbreak of invasive group A *Streptococcus* associated with varicella in a childcare center -- Boston, Massachusetts, 1997. *MMWR Morb Mortal Wkly Rep* 46:944–948.
25. **Cockerill FR, MacDonald KL, Thompson RL, Roberson F, Kohner PC, Besser-Wiek J, Manahan JM, Musser JM, Schlievert PM, Talbot J, Frankfort B, Steckelberg JM, Wilson WR, Osterholm MT.** 1997. An outbreak of invasive group A streptococcal disease associated with high carriage rates of the invasive clone among school-aged children. *JAMA* 277:38–43.
